# Supplementary material for: Patterns of practice of adaptive re-planning for anatomic variances during cone-beam CT guided radiotherapy
Source: PubMed Central journal article supplement — Tech Innov Patient Support Radiat Oncol. 2019 Dec 16;12:50–5. doi: 10.1016/j.tipsro.2019.10.003 (PMC7033808; doi:10.1016/j.tipsro.2019.10.003), 2019-12-16
Supplement: mmc3.pdf [file mmc3.pdf]

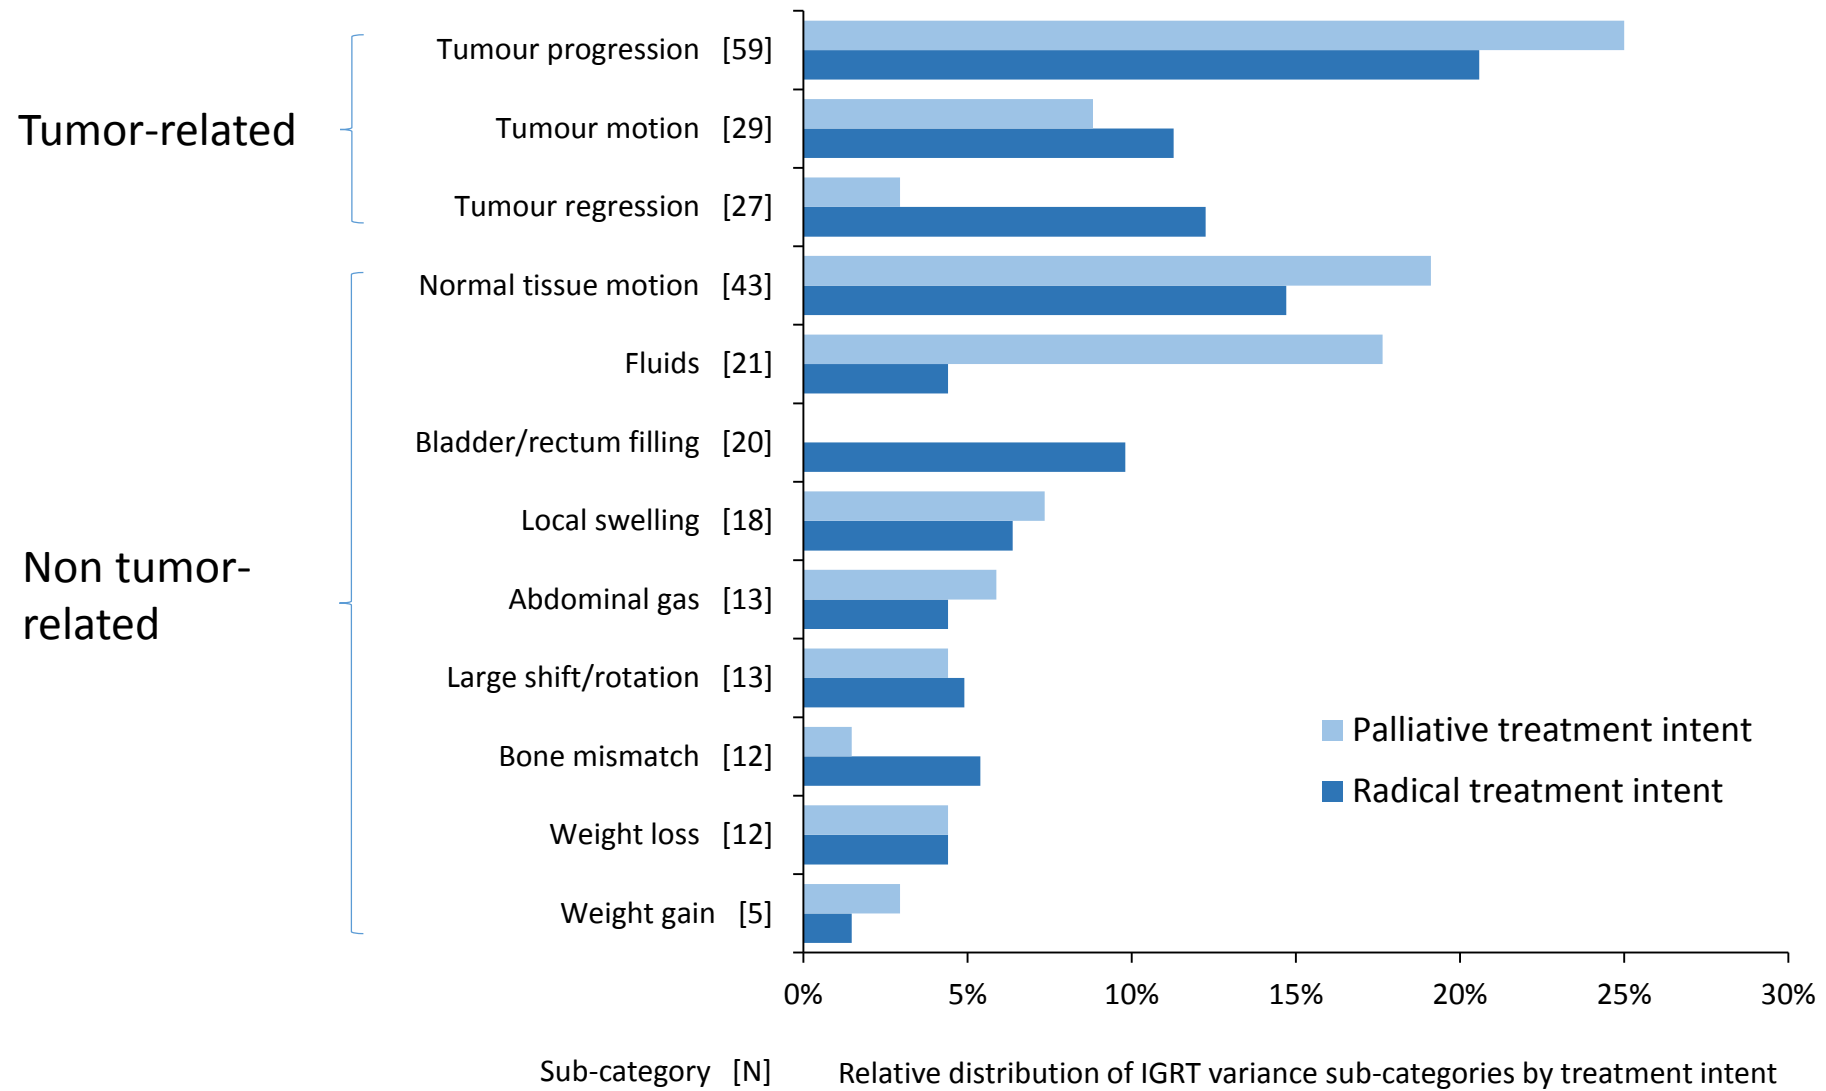

**Fig. S2.** Variations in relative distribution of sub-categories of IGRT-related variances by treatment intent. Same colored segments sum to 100% for palliative or radical intent.
