# Supplementary material for: Patterns of practice of adaptive re-planning for anatomic variances during cone-beam CT guided radiotherapy
Source: PubMed Central journal article supplement — Tech Innov Patient Support Radiat Oncol. 2019 Dec 16;12:50–5. doi: 10.1016/j.tipsro.2019.10.003 (PMC7033808; doi:10.1016/j.tipsro.2019.10.003), 2019-12-16
Supplement: mmc4.pdf [file mmc4.pdf]

**Table. S1.** Demographics and radiotherapy details for 261 patients.

| Variable                                                               | Result                                                                                                                                                                                                                                                                                                                                                                                                                                                                                                                                                                                         |
|------------------------------------------------------------------------|------------------------------------------------------------------------------------------------------------------------------------------------------------------------------------------------------------------------------------------------------------------------------------------------------------------------------------------------------------------------------------------------------------------------------------------------------------------------------------------------------------------------------------------------------------------------------------------------|
| Sex                                                                    | 165 male : 96 female                                                                                                                                                                                                                                                                                                                                                                                                                                                                                                                                                                           |
| Age, median (range)                                                    | 63 (14 – 93) years                                                                                                                                                                                                                                                                                                                                                                                                                                                                                                                                                                             |
| Treatment intent                                                       | 194 radical : 67 palliative                                                                                                                                                                                                                                                                                                                                                                                                                                                                                                                                                                    |
| Treatment disease site [ <i>most common sub-site</i> ], (N, by intent) | Lung [ <i>lungs</i> ], (38 radical, 32 palliative)<br>Head-and-neck [ <i>oropharynx</i> ], (50 radical, 1 palliative)<br>Upper gastrointestinal [ <i>esophagus</i> ], (16 radical, 14 palliative)<br>Genitourinary [ <i>prostate</i> ], (27 radical, 1 palliative)<br>Sarcoma [ <i>lower limb</i> ], (14 radical, 8 palliative)<br>Lower gastrointestinal [ <i>rectum</i> ], (13 radical, 3 palliative)<br>Gynaecological [ <i>cervix, vulva</i> ], (10 radical, 5 palliative)<br>Lymphoma [ <i>Hodgkin's lymphoma</i> ], (11 radical 1 palliative)<br>Other [n/a], (15 radical, 2 palliative) |
| Prescribed dose, median (range)                                        | 50 (10.8 – 83.4) Gy                                                                                                                                                                                                                                                                                                                                                                                                                                                                                                                                                                            |
| Prescribed fractions, median (range)                                   | 25 (5 – 54) fractions                                                                                                                                                                                                                                                                                                                                                                                                                                                                                                                                                                          |
